# Supplementary material for: Unveiling photoinduced electron transfer in cobalt(iii)-R-pyridine complexes anchored to anatase nanocrystals: photoluminescence and magnetic studies
Source: Royal Society of Chemistry journal article supplement (doi:10.1039/d4ra02648a), 2024-01-01
Supplement: d4ra02648a1.pdf [file d4ra02648a1.pdf]

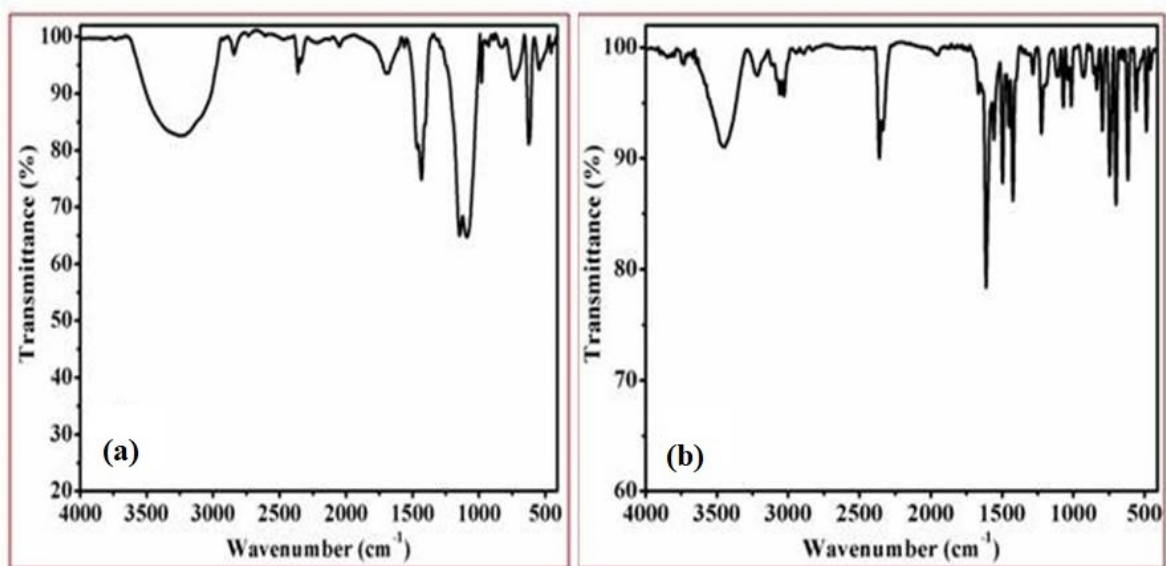

**Figure S1** FTIR spectra of (a) complex (2) and (b) complex (4) measured with KBr at 298 K. where R = (a) 4-Et, (b) 4-Bz.

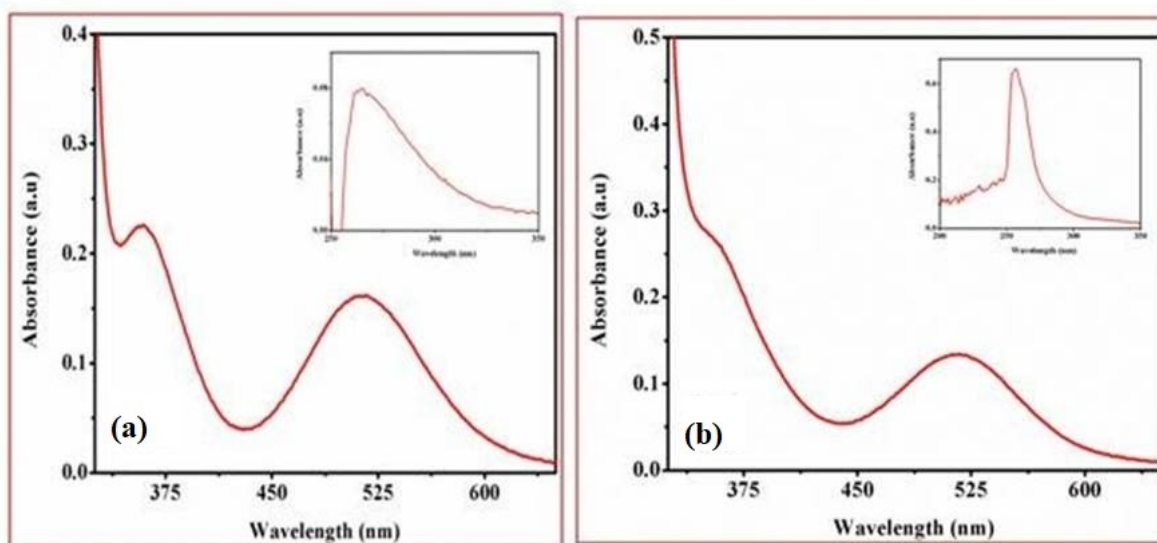

**Figure S2** UV-vis spectra of (a) complex (2) and (b) complex (4) measured in water at 298 K.

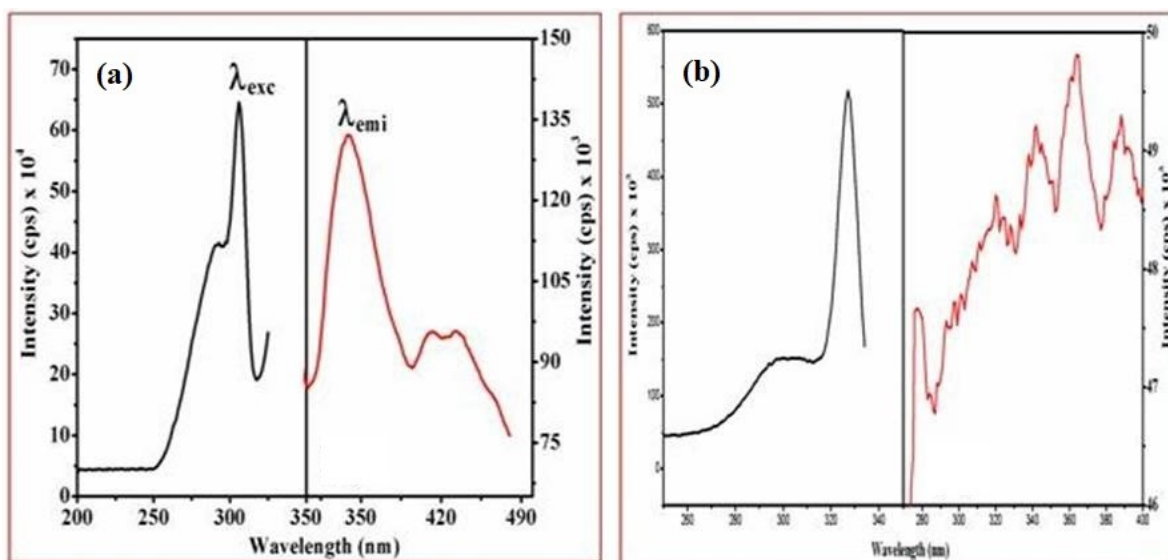

**Figure S3** Steady state excitation and emission spectra of (a) complex (2) and (b) complex (4) measured at  $\lambda_{max} = 256$  nm in water ( $\sim 2 \mu\text{M}$ ) at 298 K.

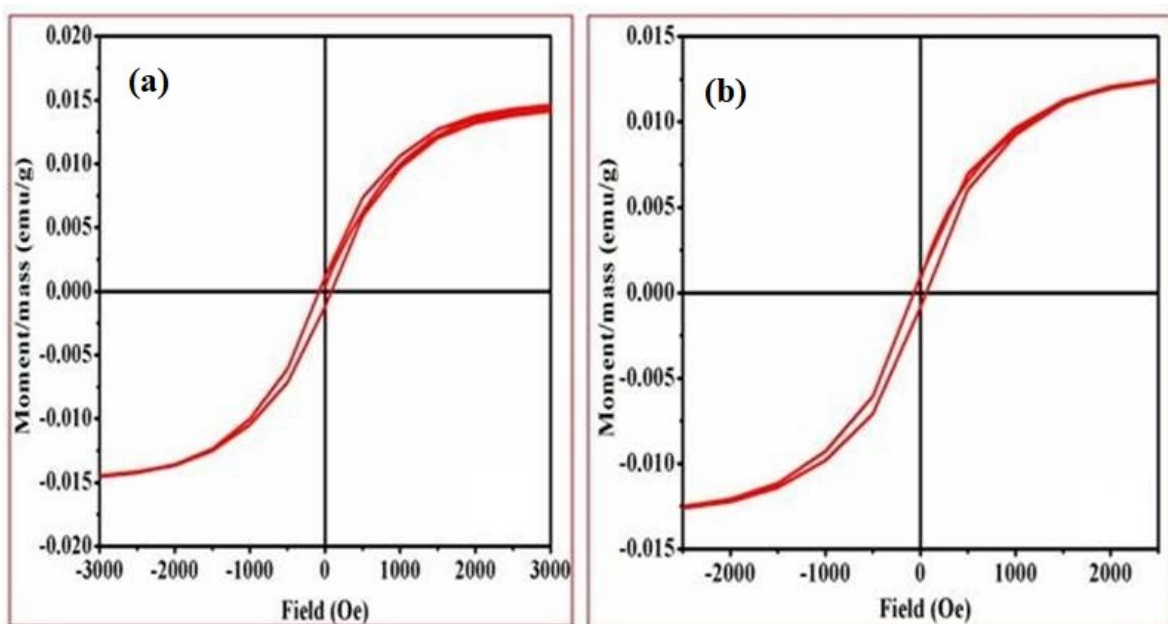

**Figure S4** Magnetic hysteresis loop of (a) complex (2) and (b) complex (4) measured at 298 K.
